# Supplementary material for: Large-scale continuous preparation of highly stable α-CsPbI3/m-SiO2 nanocomposites by a microfluidics reactor for solid state lighting application
Source: Royal Society of Chemistry journal article supplement (doi:10.1039/d2ce00424k), 2022-01-01
Supplement: d2ce00424k1.pdf [file d2ce00424k1.pdf]

## Supplementary Information

### Large-scale continuous preparation of high stable $\alpha$ -CsPbI<sub>3</sub>/m-SiO<sub>2</sub> nanocomposites by microfluidics reactor for solid state lighting application

Runze Guo<sup>a</sup>, Yufeng Liu<sup>a</sup>, Yongzheng Fang<sup>a,\*</sup>, Zhifu Liu,<sup>a</sup> Langping Dong<sup>a</sup>, Lei Wang<sup>b</sup>, Wenyao Li<sup>c,\*</sup>, Jingshan Hou<sup>a,\*</sup>

<sup>a</sup> School of Materials Science and Engineering, Shanghai Institute of Technology, Shanghai, 201418, P. R. China. E-mail: fyz1003@sina.com (Yongzheng Fang); houjingshan@sit.edu.cn (Jingshan Hou).

<sup>b</sup> School of Chemistry and Materials Science, Nanjing Normal University, Nanjing, 210023, P. R. China.

<sup>c</sup> School of Materials Engineering, Shanghai University of Engineering Science, Shanghai, 201620, P. R. China. E-mail: liwenyao314@gmail.com (Wenyao Li).

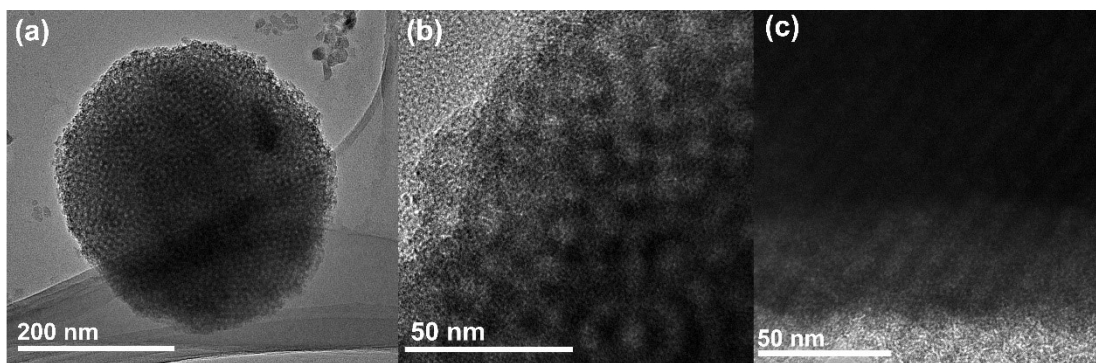

Fig. S1. (a) TEM image of the mesoporous silica nanoparticles. (b, c) HRTEM image of the edge of the mesoporous silica.

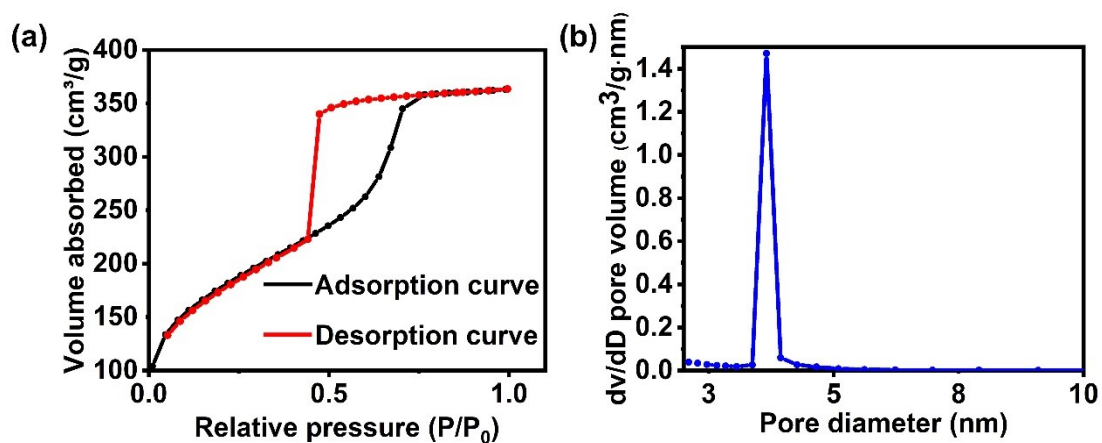

Fig. S2. N<sub>2</sub> adsorption and desorption curves of m-SiO<sub>2</sub> (b) pore size distribution chart of m-SiO<sub>2</sub>

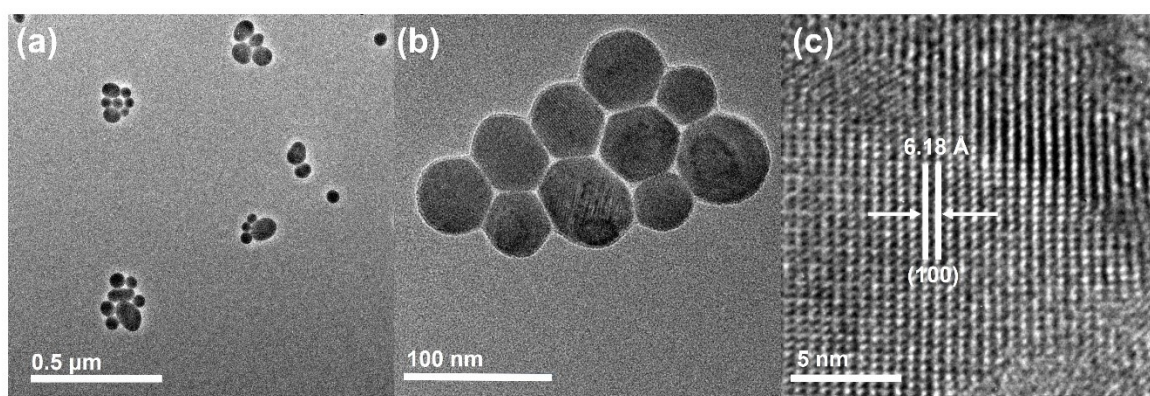

Fig. S3. (a, b) TEM image of monodispersed CsPbI<sub>3</sub> NCs. (c) HRTEM image of a CsPbI<sub>3</sub> NCs.

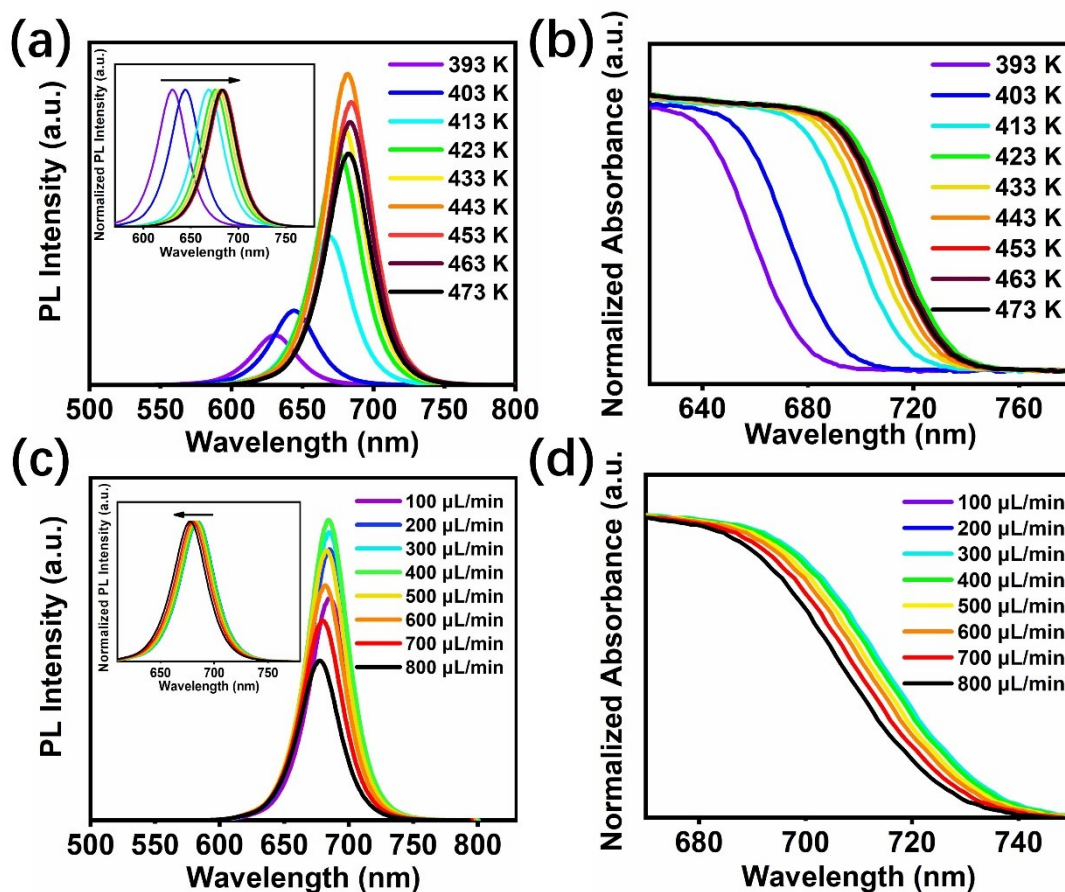

Fig. S4. The PL spectra and normalized absorbance spectra of CPI/m-SiO<sub>2</sub> using microfluidics platform by different (a, b) temperature (inset image is the normalized PL spectrum) (c, d) injection speed

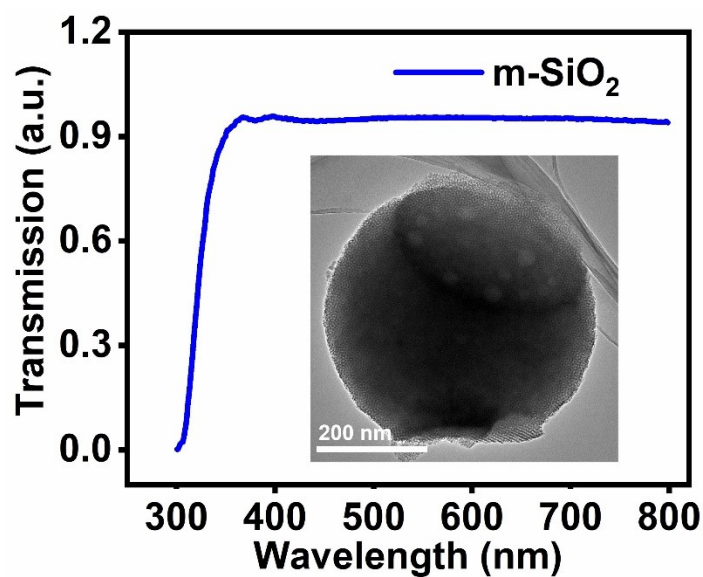

Fig. S5. Transmittance test results of mesoporous silica and the inset image is the TEM image of m-SiO<sub>2</sub>

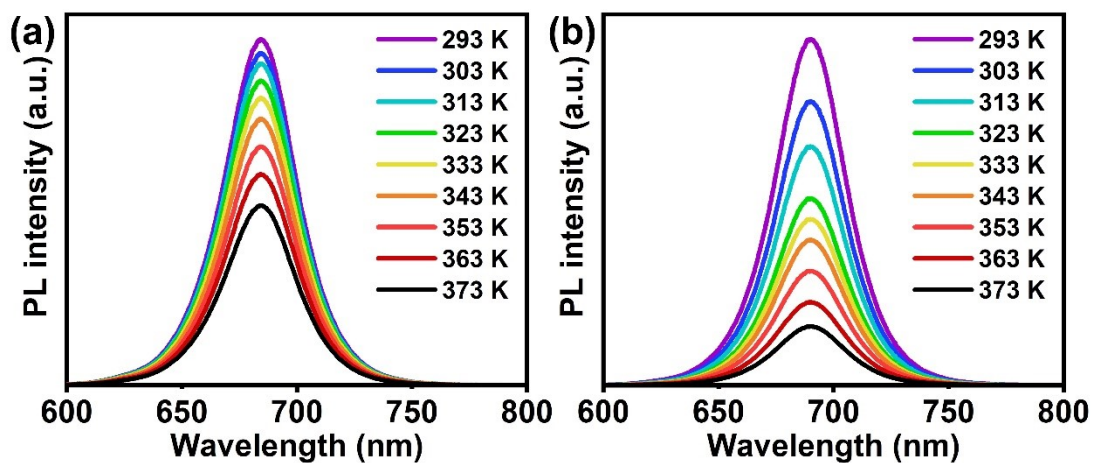

Fig. S6. Temperature-dependent PL spectra of (a) CsPbI<sub>3</sub>/m-SiO<sub>2</sub> nanocomposites and (b) CsPbI<sub>3</sub> NCs.

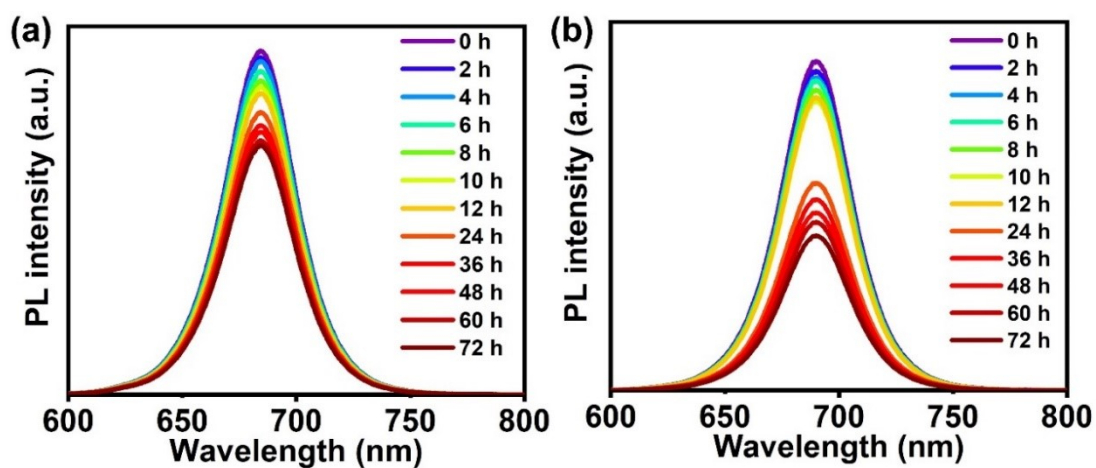

Fig. S7. Attenuation of light intensity with the illumination time of (a) CsPbI<sub>3</sub>/m-SiO<sub>2</sub> nanocomposites and (b) CsPbI<sub>3</sub> NCs.
